# Supplementary material
Source: PubMed Central journal article supplement (PMC8818037)
Supplement: NIHMS1768618-supplement-2.pdf [file NIHMS1768618-supplement-2.pdf]

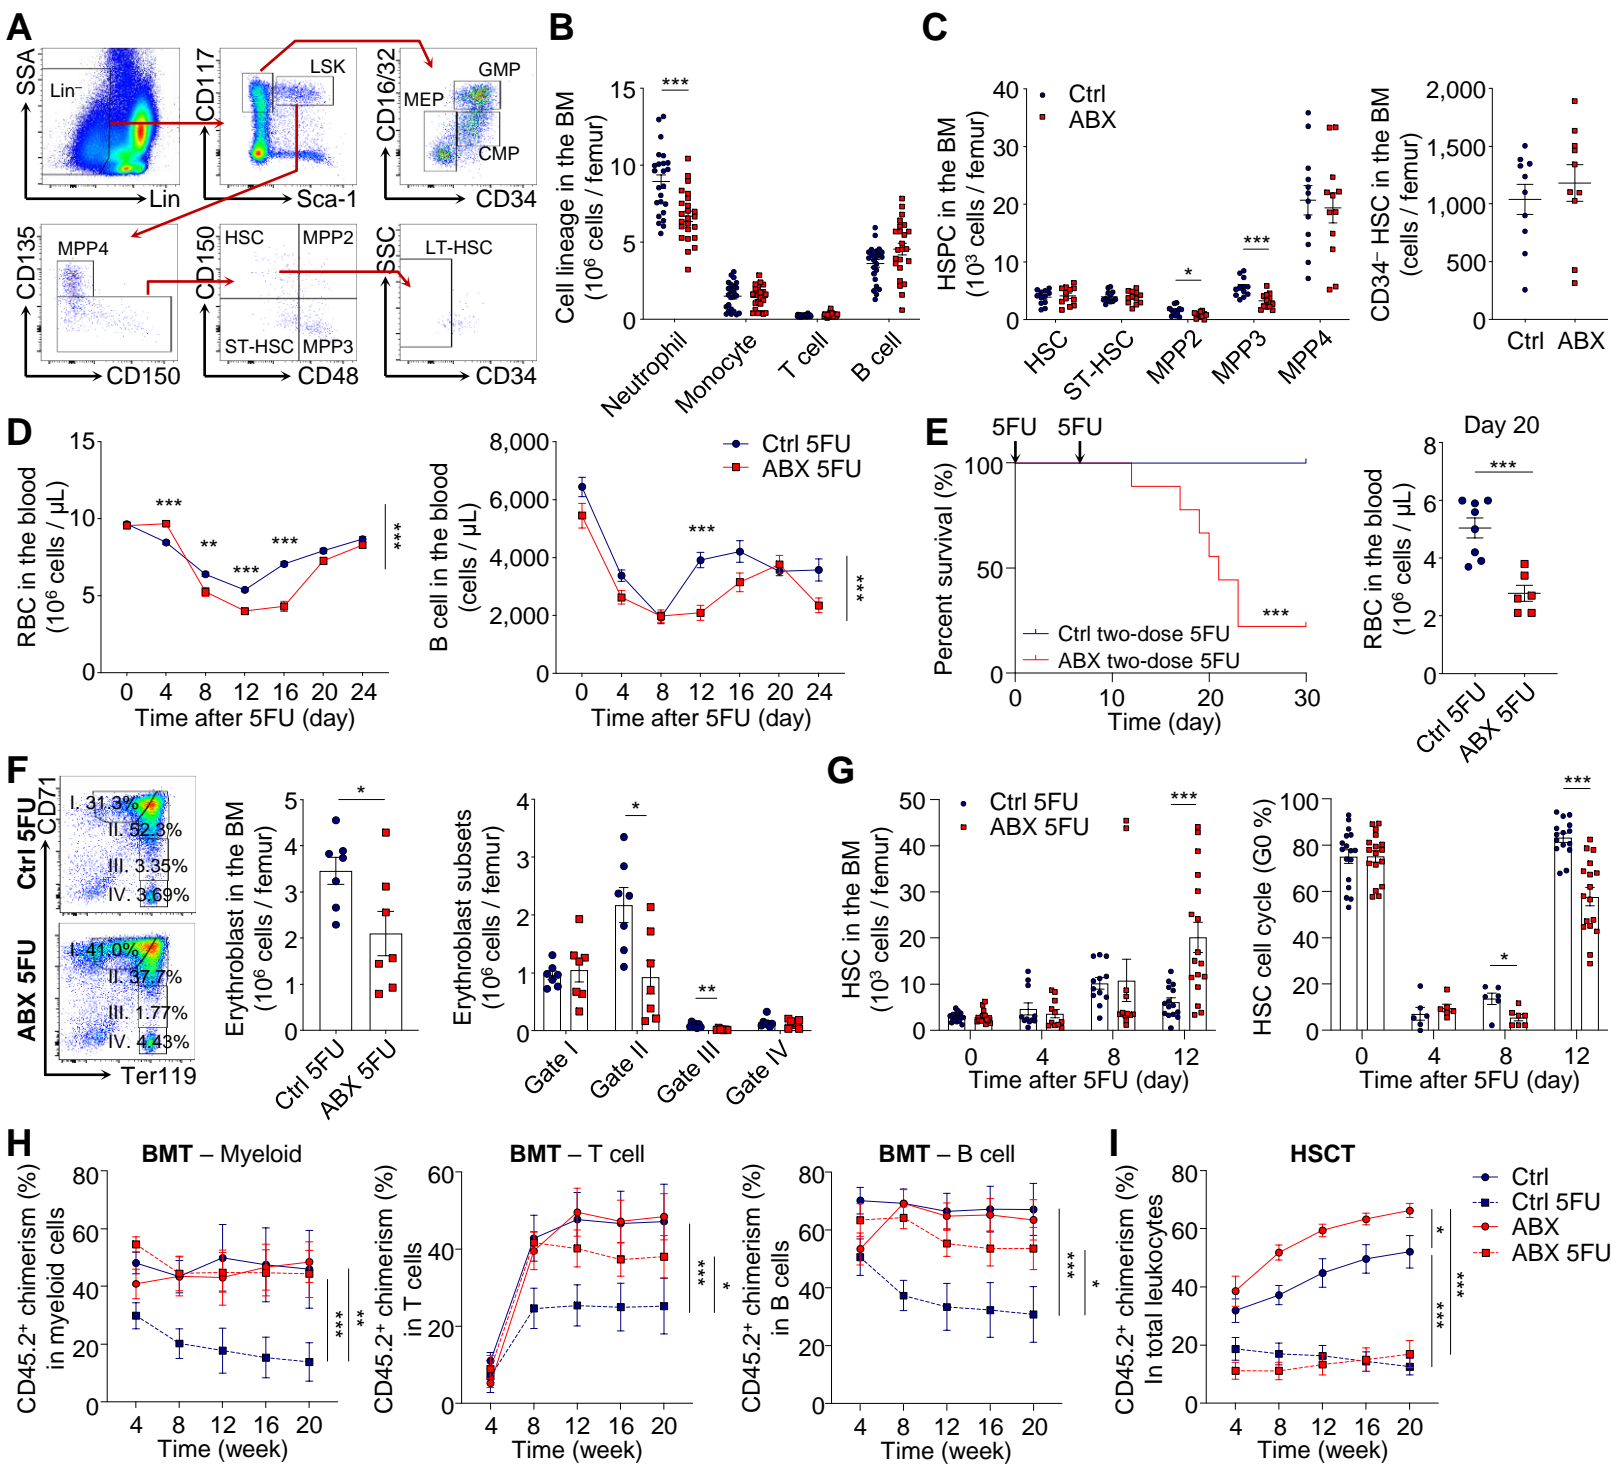

**Figure S1. Microbiota depletion leads to impaired regeneration following 5FU challenge. Related to Figure 1**

(A–C) Cell lineages, MPPs and HSCs in control and ABX-treated mice under steady state (n = 10–24). See also Figure 1E and Figure S1H–I for long-term reconstitution following BMT and HSCT.

(D) RBCs and B cells in the blood of control and ABX-treated mice after 5FU challenge (n = 6–27).

(E) Survival and RBCs in control and ABX-treated mice following two-dose 5FU challenge (n = 6–11).

(F) Erythroblast populations in control and ABX-treated mice at day 12 after 5FU challenge (n = 7).

(G) Time-course analyses of HSCs and HSC cell cycling in the BM of control and ABX-treated mice after 5FU challenge (n = 6–17).

(H–I) Multi-lineage reconstitution following BMT in control and ABX-treated mice under steady state or at day 12 after 5FU challenge (n = 5–7); HSCT analysis of sorted HSCs from the same conditions (n = 7–10).

\* p < 0.05, \*\* p < 0.01, \*\*\* p < 0.001. Error bars, mean  $\pm$  SEM.

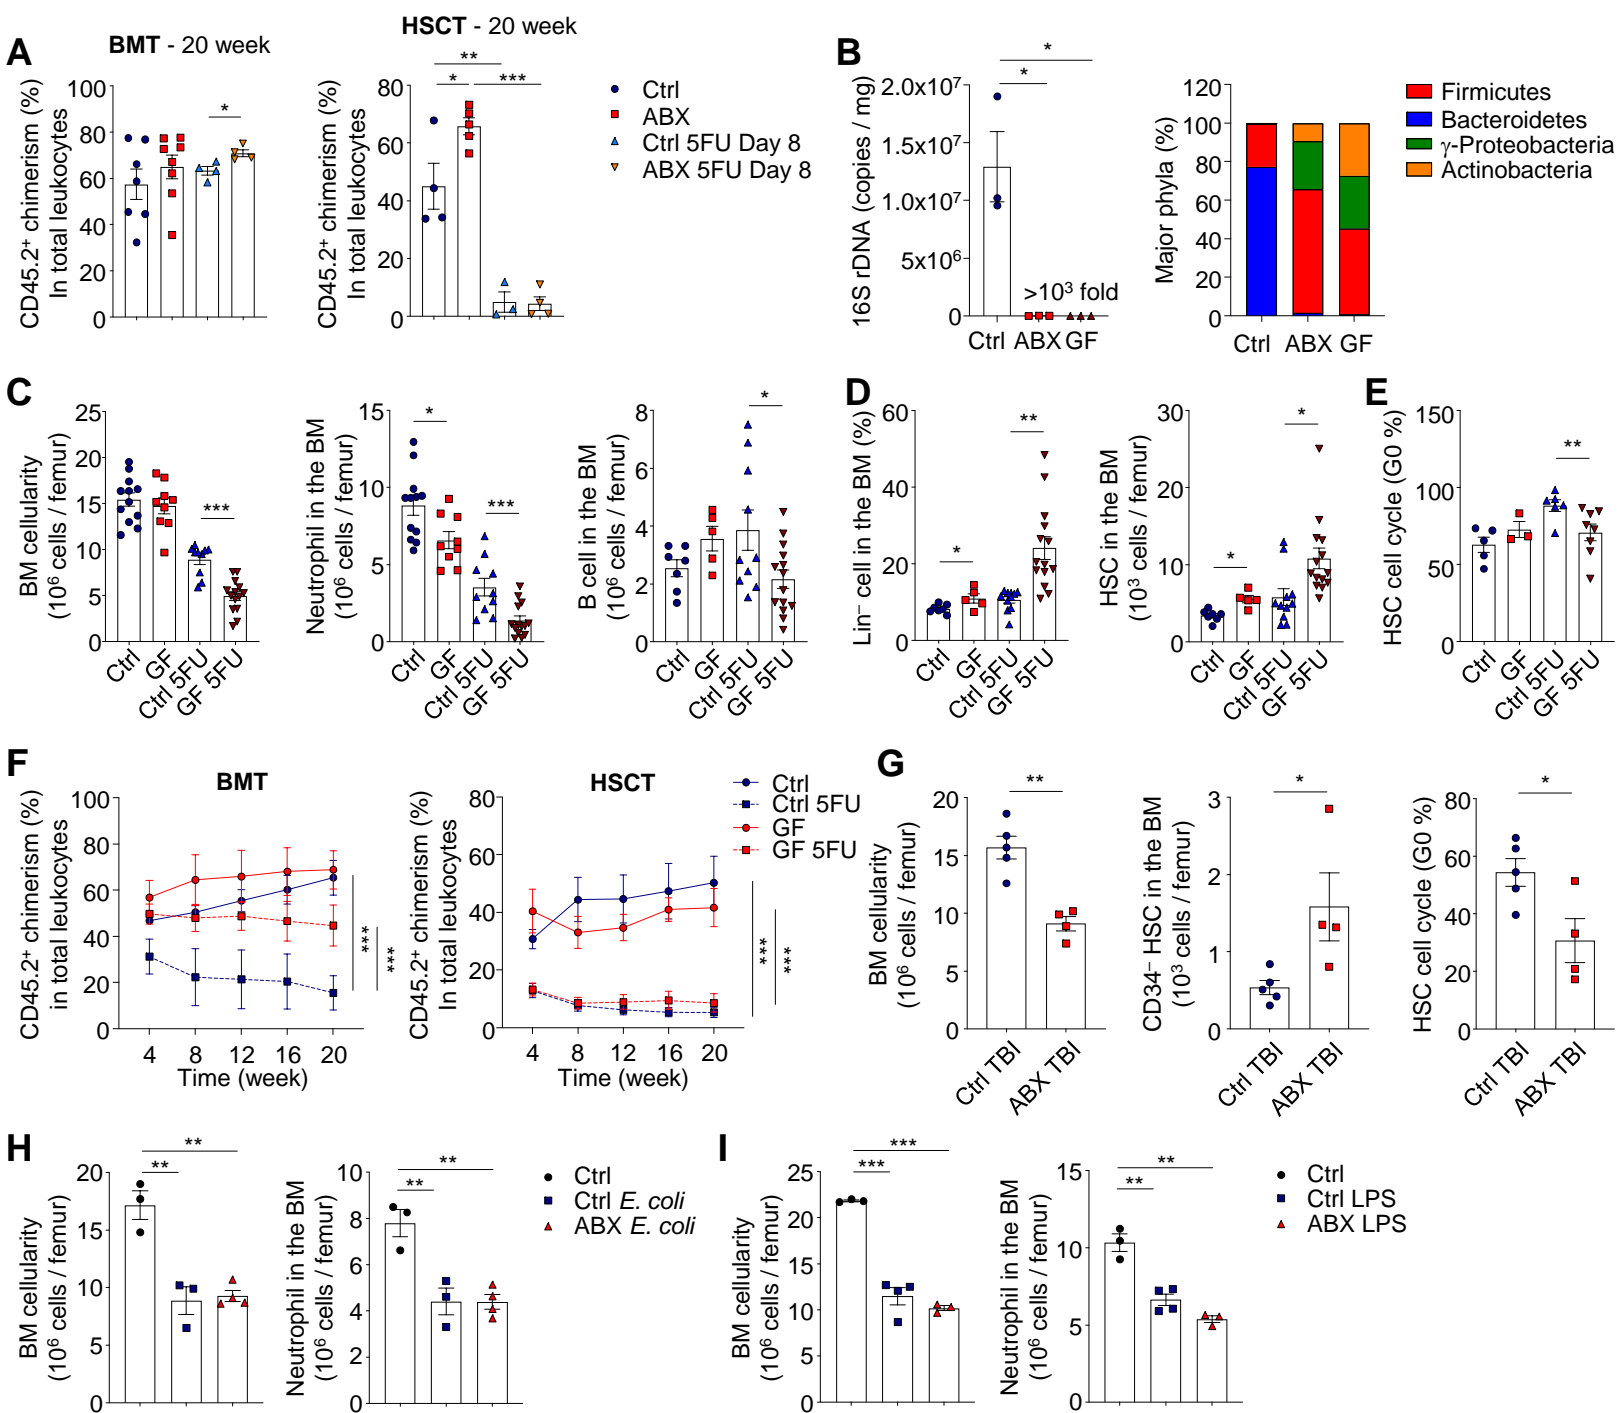

**Figure S2. The microbiota regulates HSC response in stress conditions. Related to Figure 1 and 2**

(A) BMT and HSCT analyses of control and ABX-treated mice under steady state or at day 8 after 5FU challenge (n = 3–8).

(B) Total 16S rDNA copy numbers and the percentages of major phyla constituents of the microbiota in control, ABX-treated and GF animals at day 12 following 5FU challenge (n = 3).

(C–E) Total BM cellularity, neutrophils and B cells, Lin<sup>-</sup> cells, HSCs, and HSC cell cycling in control and GF mice under steady state or at day 12 after 5FU challenge (n = 3–14).

(F) BMT and HSCT analyses of control and GF mice under steady state or at day 12 after 5FU challenge (n = 3–10).

(G) BM Cellularity, CD34<sup>-</sup> LT-HSCs and HSC cell cycling in control and ABX-treated mice at day 24 after sublethal TBI (n = 4–5).

(H–I) Total cellularity and neutrophils in the BM of control and ABX-treated mice with or without *E. coli* infection or LPS challenge (n = 3–4).

\* p < 0.05, \*\* p < 0.01, \*\*\* p < 0.001. Error bars, mean ± SEM.

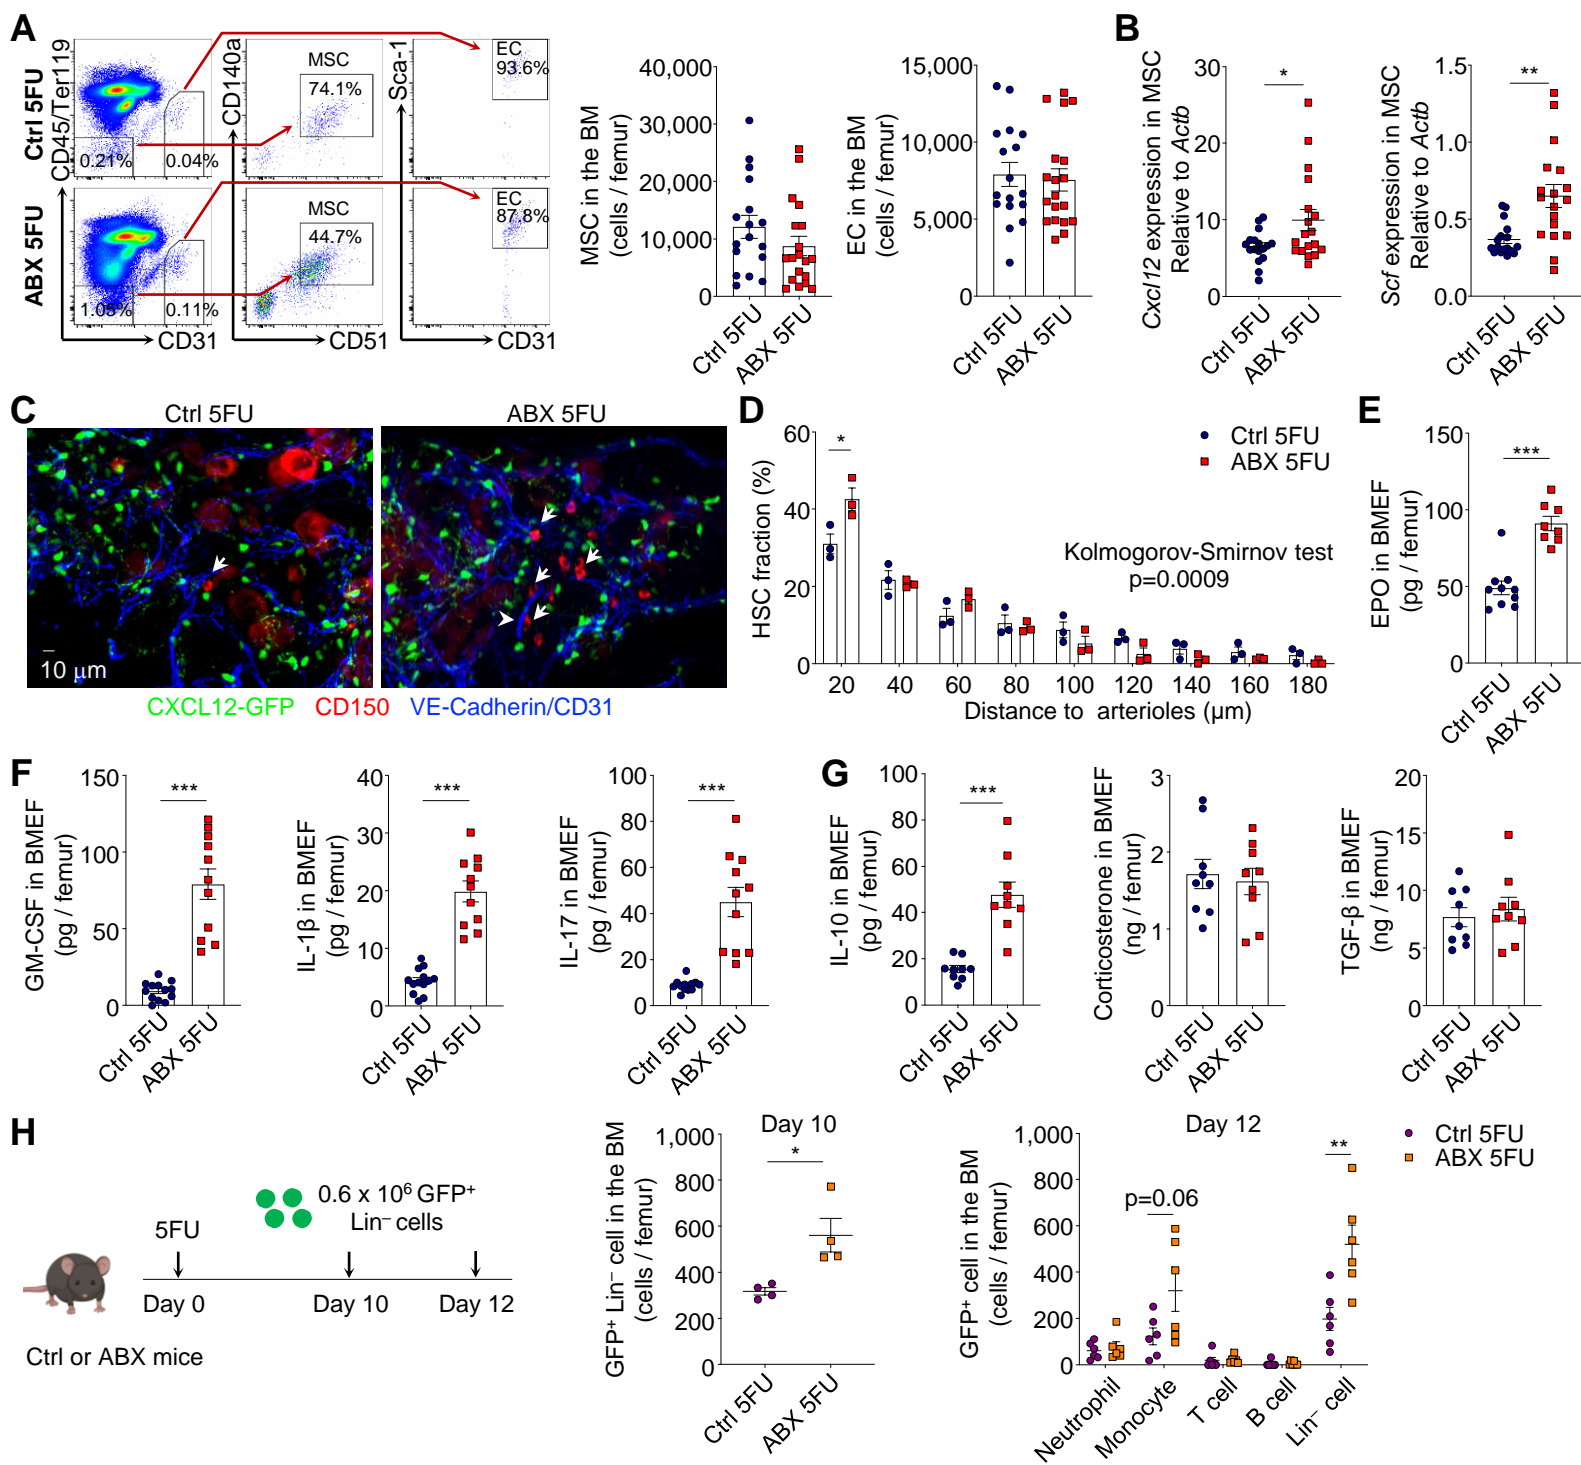

**Figure S3. Microbiota depletion alters the BM microenvironment in regenerative condition. Related to Figure 1**

(A–B) MSC and EC numbers, and the expression levels of niche factors in MSCs from control and ABX-treated mice at day 12 after 5FU challenge ( $n = 17–19$ ).

(C–D) HSC distribution assessed by immunofluorescence in control and ABX-treated mice at day 12 after 5FU challenge ( $n = 3$ ). Arrows point at HSCs identified by CD150<sup>+</sup> Lin<sup>-</sup> CD48<sup>-</sup> staining; arrowhead points at arterioles. Scale bar, 10  $\mu\text{m}$ .

(E–G) Erythropoietic, pro-inflammatory and anti-inflammatory cytokine levels in bone marrow extracellular fluid (BMEF) at day 12 after 5FU challenge ( $n = 8–13$ ).

(H) Adoptive transfer of GFP<sup>+</sup> Lin<sup>-</sup> cells to evaluate progenitor homing and differentiation in control and ABX-treated mice. Mice analyzed on the same day for homing and two days later for differentiation ( $n = 4–6$ ).

\*  $p < 0.05$ , \*\*  $p < 0.01$ , \*\*\*  $p < 0.001$ . Error bars, mean  $\pm$  SEM.

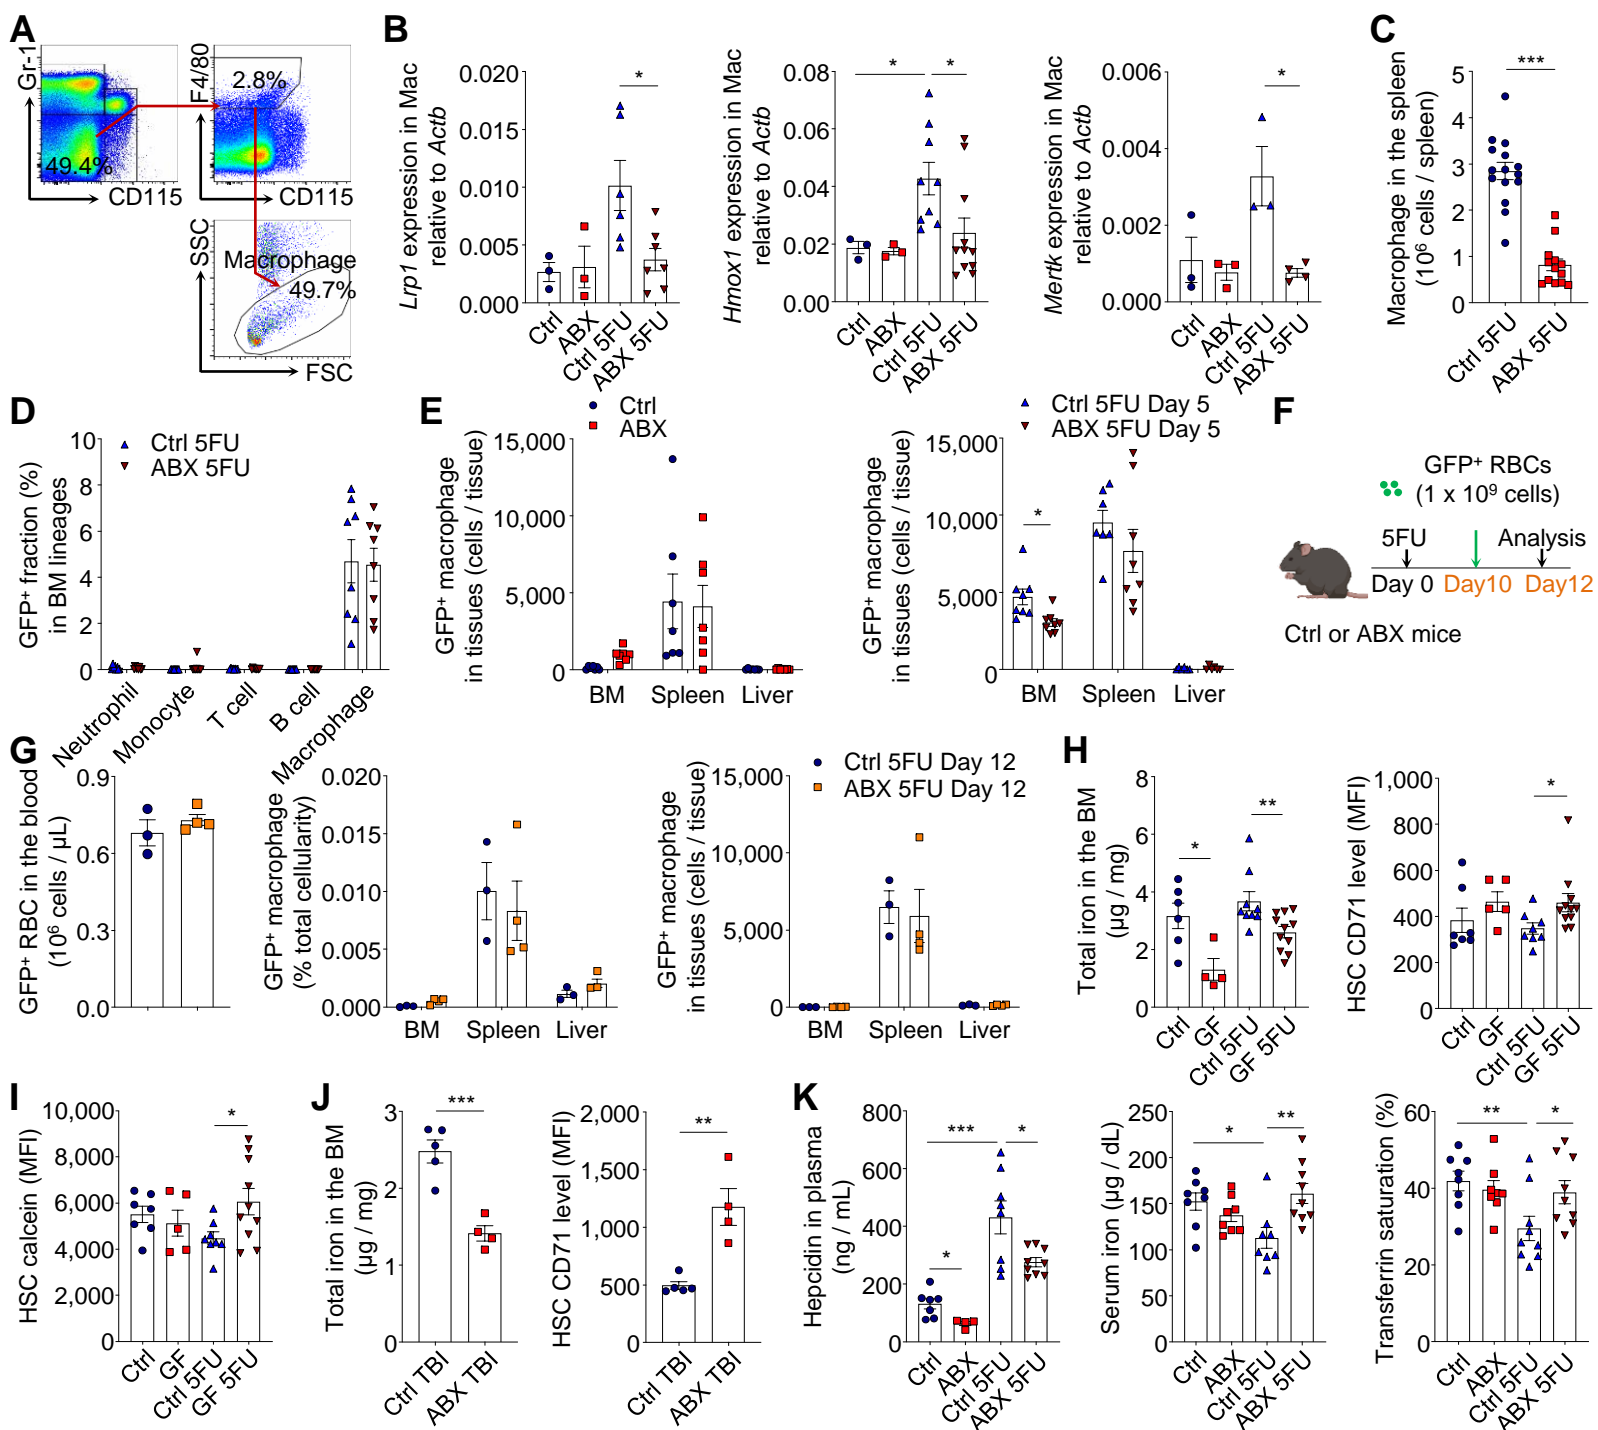

**Figure S4. The microbiota regulates macrophage-mediated erythrophagocytosis and local iron availability during regeneration. Related to Figure 3**

(A–B) Macrophage gating and the expression levels of phagocytosis and RBC degradation-related genes in BM macrophages of control and ABX-treated mice under steady state or at day 12 after 5FU challenge ( $n = 3–11$ ). *Lrp1*, low density lipoprotein receptor-related protein 1; *Hmox1*, heme oxygenase 1; *Mertk*, proto-oncogene tyrosine-protein kinase MER. See also Figure S6E for gene expression in the early stages.

(C) Splenic macrophages in control and ABX-treated mice at day 12 after 5FU challenge ( $n = 13–15$ ).

(D–G) GFP+ fraction in BM cell lineages, and GFP+ macrophages in different tissues in control and ABX-treated mice under steady state or in the early stages of regeneration (day 3–5;  $n = 6–8$ ); GFP+ RBC clearance and phagocytosis in the late stages of regeneration (day 10–12;  $n = 3–4$ ).

(H–J) BM Iron levels, HSC CD71 expression and calcein fluorescence in control and GF mice under steady state or at day 12 after 5FU challenge ( $n = 4–11$ ); in control and ABX-treated mice at day 24 after sublethal irradiation ( $n = 4–5$ ). See also Figure S6G calcein analysis in ABX-treated mice.

(K) Hepcidin levels, serum iron levels and transferrin saturation in control and ABX-treated mice under steady state or at day 12 after 5FU challenge ( $n = 4–9$ ).

\*  $p < 0.05$ , \*\*  $p < 0.01$ , \*\*\*  $p < 0.001$ . Error bars, mean  $\pm$  SEM.

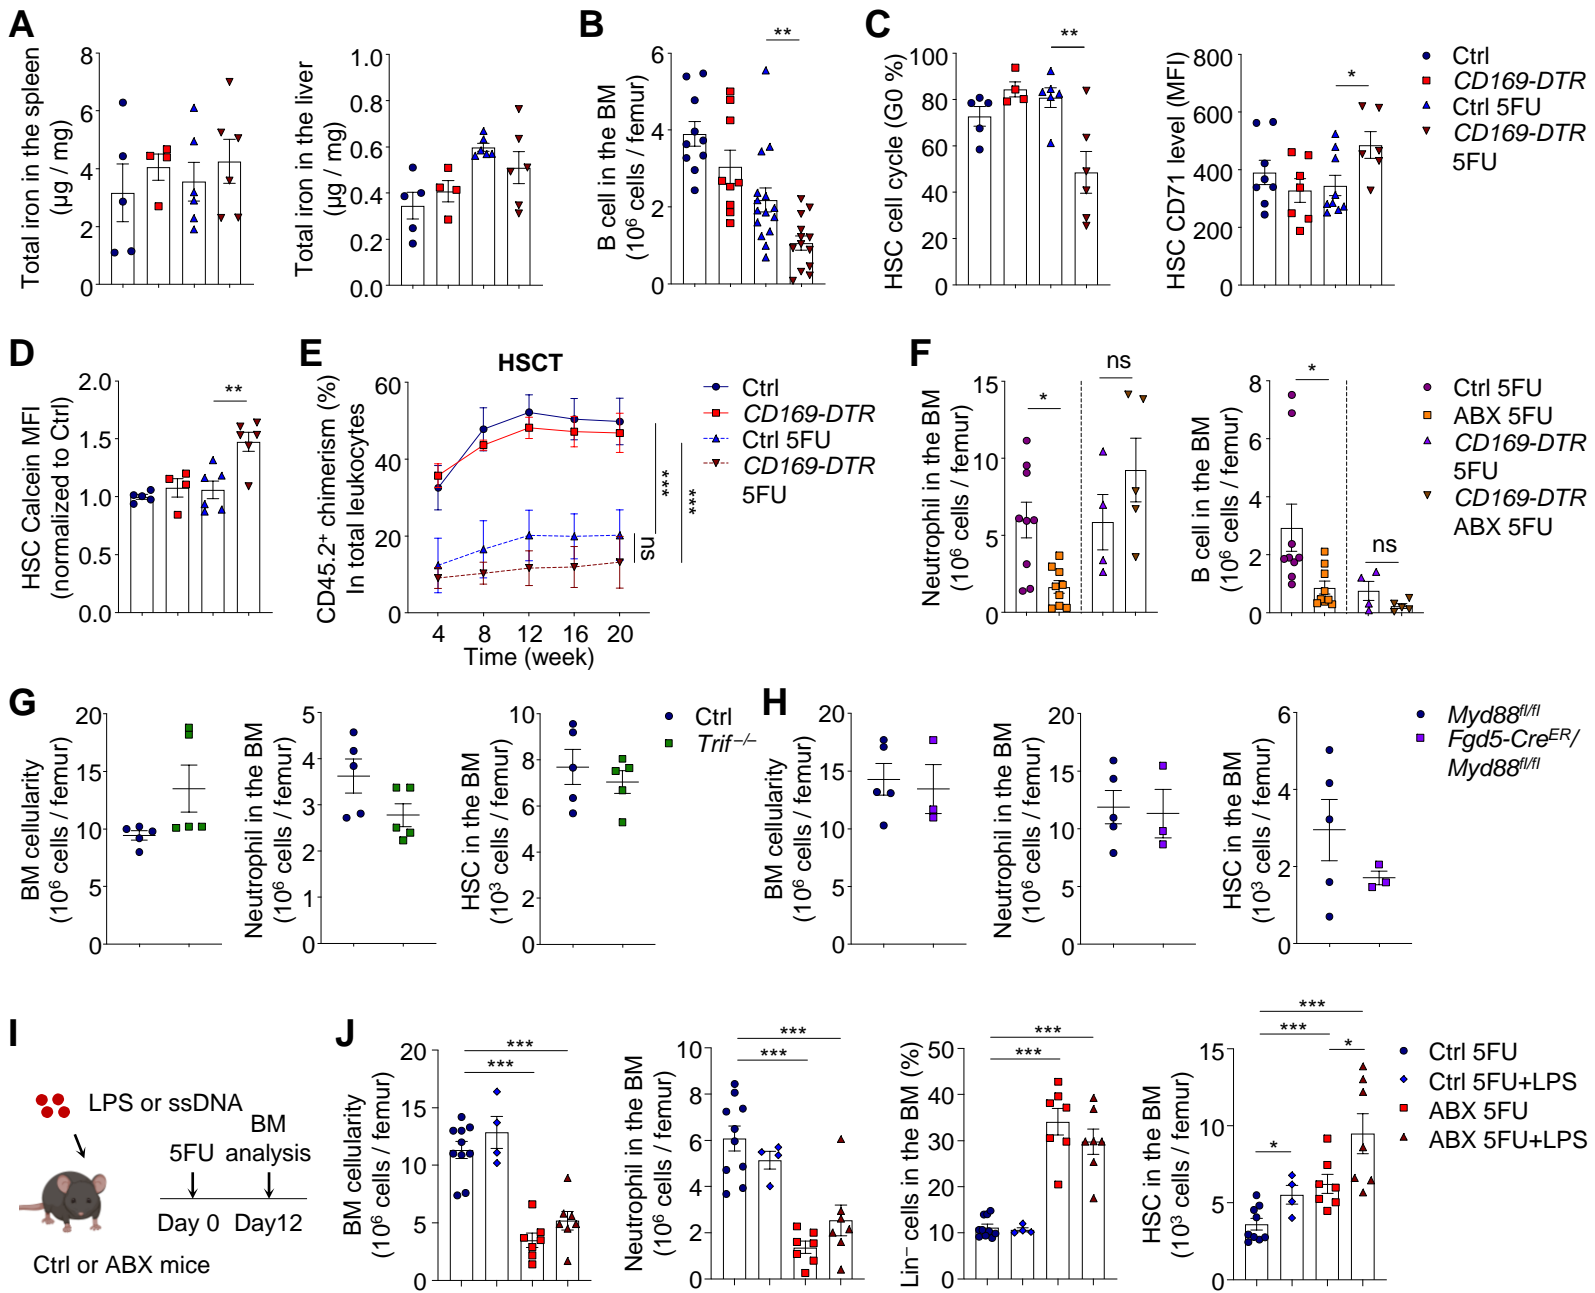

**Figure S5. BM macrophages mediate the crosstalk between the microbiota and HSCs. Related to Figure 4 and Figure 5**

(A) Spleen and liver iron levels in control and *CD169-DTR* mice under steady state or at day 12 after 5FU challenge (n = 4–6).

(B–E) B cells, HSC cell cycling, CD71 expression, calcein fluorescence and HSCT analysis in control and *CD169-DTR* mice under steady state or at day 12 after 5FU challenge (n = 4–15).

(F) Neutrophils and B cells in control or *CD169-DTR* mice with or without ABX treatment at day 12 after 5FU challenge (n = 4–9).

(G–H) BM cellularity, neutrophils and HSCs at day 12 after 5FU challenge in *Trif*<sup>-/-</sup> mice (n = 5); and in *Fgd5-Cre<sup>ER</sup>/Myd88<sup>fl/fl</sup>* mice (n = 3–5).

(I–J) BM cellularity, neutrophils, Lin<sup>-</sup> cells, and HSCs in control and ABX-treated mice with or without LPS gavage, at day 12 after 5FU challenge (n = 4–10).

\* p < 0.05, \*\* p < 0.01, \*\*\* p < 0.001; ns, not significant. Error bars, mean  $\pm$  SEM.

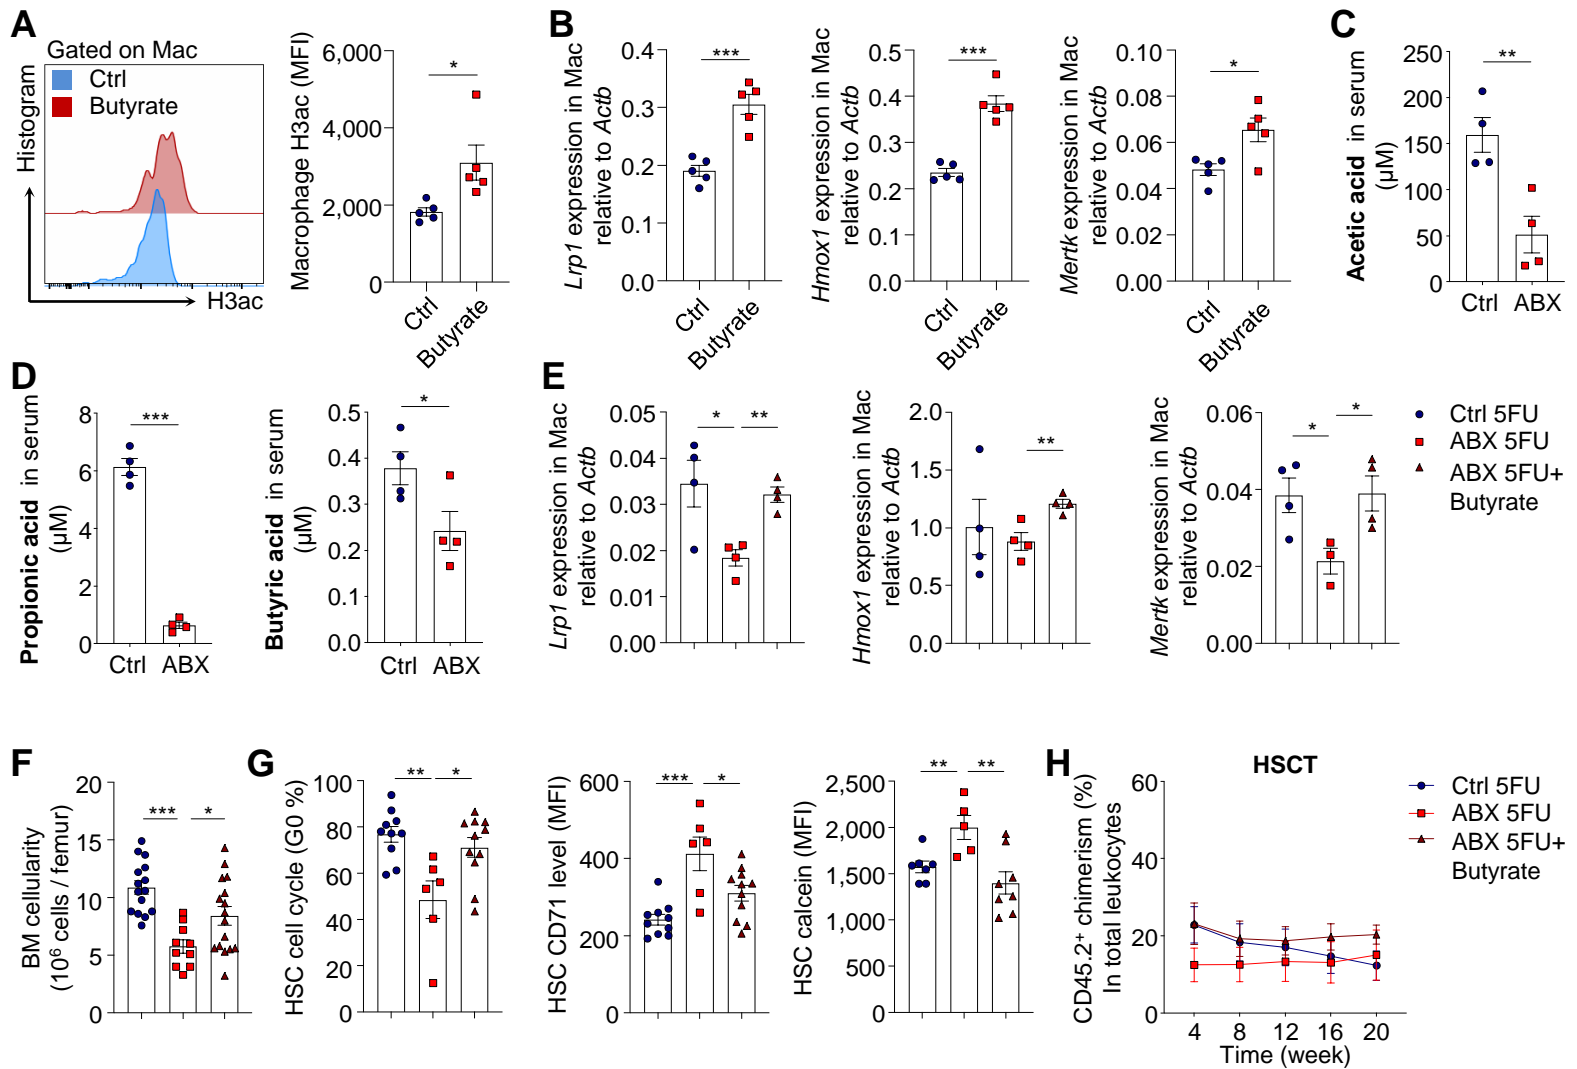

**Figure S6. The microbial metabolite butyrate orchestrates macrophage function, iron availability and HSC response in the BM during regeneration. Related to Figure 5**

(A–B) Histone H3 acetylation (H3ac) levels and expression levels of *Lrp1*, *Hmox1* and *Mertk* in BM-derived macrophages cultured with or without butyrate (n = 5).

(C–D) Quantification of serum levels of major SCFA species in control or ABX-treated mice (n = 4).

(E) Expression levels of *Lrp1*, *Hmox1* and *Mertk* in BM macrophages of control, ABX-treated and ABX-treated mice supplemented with butyrate, in the early phase of regeneration (day 3–5; n = 3–4).

(F–G) BM cellularity, HSC cell cycling, CD71 expression and calcein fluorescence in control, ABX-treated and ABX-treated mice supplemented with butyrate, at day 12 after 5FU treatment (n = 5–16).

(H) HSCT analysis of control, ABX-treated or ABX-treated mice supplemented with butyrate, at day 12 after 5FU challenge (n = 6–7).

\* p < 0.05, \*\* p < 0.01, \*\*\* p < 0.001. Error bars, mean  $\pm$  SEM.

**A**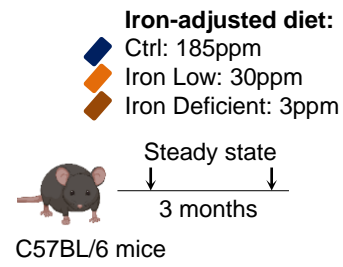

|          | RBC<br>(10 <sup>6</sup> cells/ $\mu$ L) | Hemoglobin<br>(g/dL) | MCV<br>(fL)        | Neutrophil<br>(cells/ $\mu$ L) |
|----------|-----------------------------------------|----------------------|--------------------|--------------------------------|
| Ctrl     | 9.8 $\pm$ 0.2                           | 14.2 $\pm$ 0.3       | 52.7 $\pm$ 0.6     | 741 $\pm$ 142                  |
| Iron Low | 9.9 $\pm$ 0.2                           | 13.2 $\pm$ 0.4       | 51.2 $\pm$ 0.5     | 573 $\pm$ 105                  |
| Iron Def | 10.8 $\pm$ 0.4 *                        | 12.1 $\pm$ 0.3 ***   | 45.6 $\pm$ 1.7 *** | 378 $\pm$ 34 *                 |

MCV, Mean corpuscular volume.  
Data are presented as Mean  $\pm$  SEM.

**B**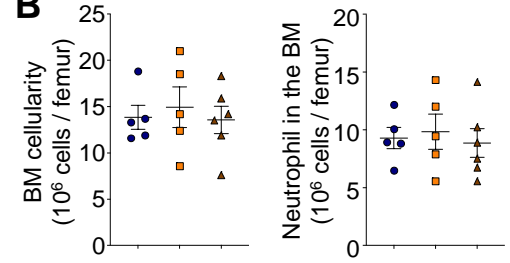**C**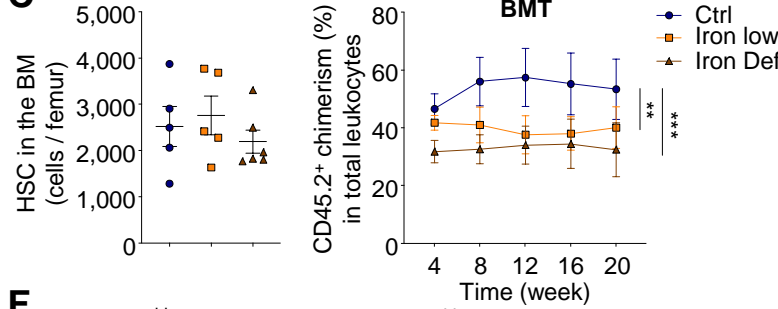**D**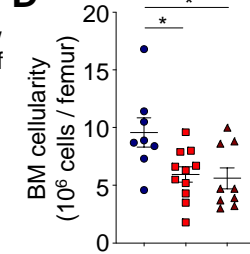**E**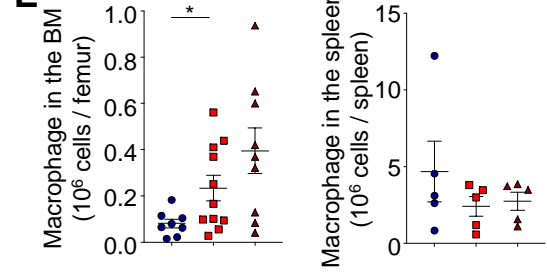**F**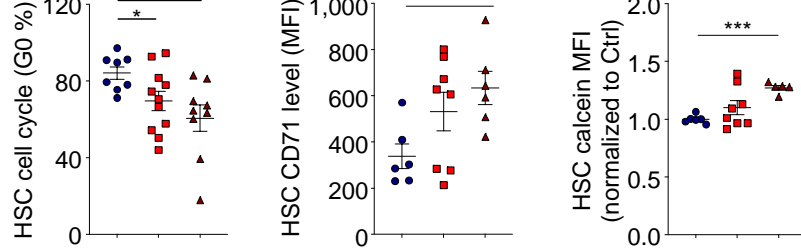**G**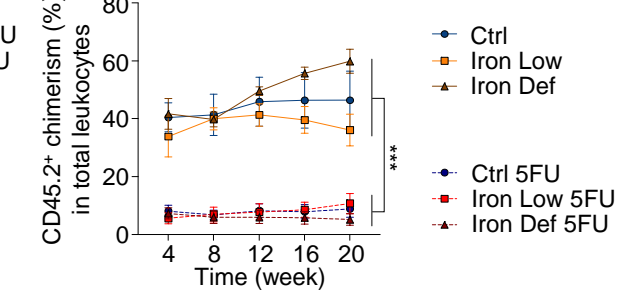**H**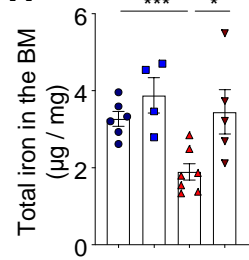**I**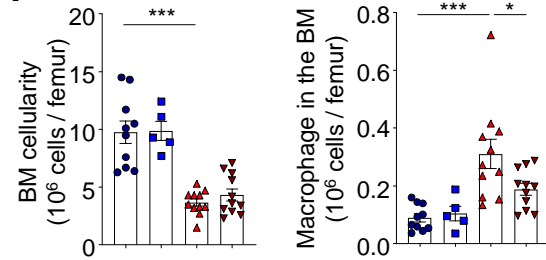**J**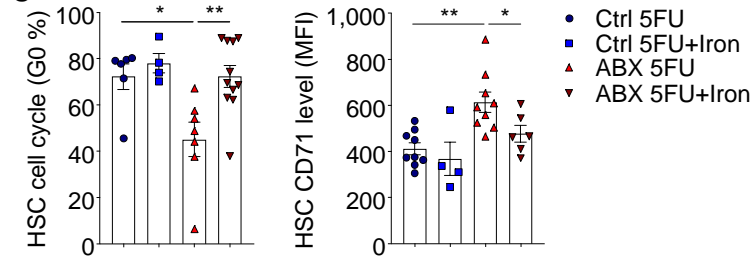**K**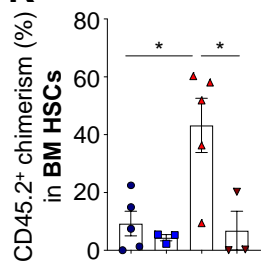**L**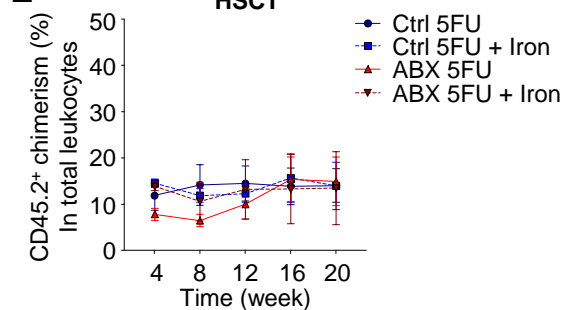**M**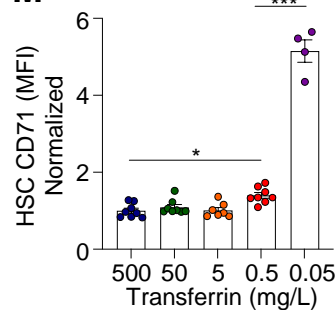

**Figure S7. Manipulations of iron levels in steady-state, regenerative and culture conditions. Related to Figure 6 and Figure 7**

(A–C) Blood parameters, BM cellularity, neutrophils, HSCs, and long-term reconstitution following BMT under steady state in mice fed with normal, iron-low or iron-deficient food (n = 5–9).

(D–F) BM cellularity, BM and splenic macrophages, HSC cell cycling, CD71 expression and calcein fluorescence in mice fed with normal, iron-low or iron-deficient food, at day 12 after 5FU challenge (n= 5–11).

(G) HSCT analysis of mice fed with normal, iron-low or iron-deficient food under steady state or at day 12 after 5FU challenge (n= 3–9).

(H–J) BM iron levels, total cellularity, macrophages, HSC cell cycling and CD71 expression at day 12 after 5FU challenge in control or ABX-treated mice injected with PBS or iron dextran (n = 4–11).

(K) Percentages of CD45.2<sup>+</sup> donor cells in recipient BM HSCs 20 weeks post BMT (n= 3–5) .

(L) HSCT analysis of control or ABX-treated mice with or without iron supplementation, at day 12 after 5FU challenge (n= 3–5).

(M) CD71 expression levels of HSCs cultured in the PVA-based serum-free system with defined transferrin levels (n = 4–8).

\* p < 0.05, \*\* p < 0.01, \*\*\* p < 0.001. Error bars, mean ± SEM.



**Table S1. Primers for real-time qPCR. Related to Figure S4B and S6E**

| <b>Gene Symbol (Mouse)</b> | <b>Forward</b>         | <b>Reverse</b>        |
|----------------------------|------------------------|-----------------------|
| <i>Actb</i>                | GCTTCTTTGCAGCTCCTTCGT  | ATCGTCATCCATGGCGAACT  |
| <i>Lrp1</i>                | ACTATGGATGCCCTAAAACCTG | GCAATCTCTTTCACCGTCACA |
| <i>Hmox1</i>               | GCCACCAAGGAGGTACACAT   | GCTTGTTGCGCTCTATCTCC  |
| <i>Mertk</i>               | GATTCTGGCCAGCACAAACAGA | GAGATATCCGGTAGCCCACCA |

**Table S2. Primers for 16S rDNA analysis. Related to Figure S2B**

| <b>Bacterial Phyla</b>   | <b>Forward</b>             | <b>Reverse</b>       |
|--------------------------|----------------------------|----------------------|
| Pan-bacteria             | ACTCCTACGGGAGGCAGCAGT      | ATTACCGCGGCTGCTGGC   |
| Bacteroidetes            | CRAACAGGATTAGATACCCT       | GGTAAGGTTCTCGCGTAT   |
| Firmicutes               | GGAGYATGTGGTTTAATTCTGAAGCA | AGCTGACGACAACCATGCAC |
| $\gamma$ -Proteobacteria | TCGTCAGCTCGTGYGTGA         | CGTAAGGGCCATGATG     |
| Actinobacteria           | TACGGCCGCAAGGCTA           | TCRTCCCCACCTTCTCCG   |
